# Supplementary material
Source: publisher figshare collection journal article supplement (https://gsapubs.figshare.com/ndownloader/files/23304014)
Supplement: Supplementary file 1 [file 23304014]

## Sheet: Sheet1
	Strat.Pos.	Grain-size	Field description	Color	Clay/Finest silt	Silt	Sand
Clay	55.25	UDC-221	mudstone	olive gray	89.2163	10.6911	0.0926125
	110.5	UDC-442	mudstone	olive gray	88.2553	10.9209	0.823803
	33.25	UDC-133	mudstone	olive gray	82.5795	17.2864	0.13415
	19	UDC-76	mudstone	purple	82.047	17.9458	0.00712333
	117	UDC-468	mudstone	brown	81.9679	17.9778	0.05425
	69.75	UDC-279	mudstone	olive gray	80.4633	19.4331	0.103567
	92.75	UDC-371	mudstone	purple	80.1447	17.859	1.99628
	3.75	UDC-15	mudstone	dark reddish brown	78.7397	21.2603	0
	108.5	UDC-434	mudstone	dark reddish brown	78.6579	21.0184	0.32365
	57	UDC-228	mudstone	purple	75.6139	19.365	5.02114
Average					81.7686	17.3758	0.855658
Standard Deviation					4.20836	3.70926	1.58812
Silty clay	83.25	UDC-333	mudstone	light purple	74.0998	22.666	3.23422
	117.75	UDC-471	mudstone	olive gray	73.967	23.8132	2.21983
	4.75	UDC-19	mudstone	purple	73.8197	24.6652	1.51511
	42	UDC-168	mudstone	dark reddish brown	65.2264	29.3287	5.44494
	21.5	UDC-86	mudstone	dark reddish brown	65.0833	32.553	2.36368
	101	UDC-404	mudstone	dull reddish brown	62.7586	36.7158	0.525628
	40.25	UDC-161	mudstone	olive gray	59.199	38.853	1.94797
	8.75	UDC-35	mudstone	gray	58.243	38.7833	2.97371
	35.5	UDC-142	mudstone	dark reddish brown	56.9117	42.9884	0.099925
	36.25	UDC-145	mudstone	pale yellowlish	53.8002	25.2011	20.9986
	78	UDC-312	mudstone	brown	51.6962	47.5346	0.769175
Average					63.1641	33.0093	3.82662
Standard Deviation					8.10037	8.53049	5.88475
Clayey silt	18.25	UDC-73	slitstone	gray	43.8896	52.3027	3.80775
	12.75	UDC-51	slitstone	pale yellowlish	35.3861	64.4973	0.116615
	49.75	UDC-199	slitstone	pale yellowlish	27.3691	71.092	1.53886
	60.5	UDC-242	slitstone	pale yellowlish	22.9576	59.7706	17.2717
	26.75	UDC-107	slitstone	brown	28.4033	52.6296	18.9671
	14.25	UDC-57	slitstone	gray	38.3514	52.1336	9.51495
Average					32.7262	58.7376	8.53618
Standard Deviation					7.82497	7.86387	8.10287
Fine sand and sandy silt	66.5	UDC-266	slitstone	pale yellowlish	20.6295	49.1432	30.2272
	84.75	UDC-339	slitstone	brown	40.9684	48.1418	10.8898
	1	UDC-4	slitstone	pale yellowlish	39.7823	41.6481	18.5696
	78.75	UDC-315	sandstone	pale yellowlish	26.954	38.4752	34.5708
	5.25	UDC-21	slitstone	pale yellowlish	33.0611	33.8955	33.0434
	57.25	UDC-229	sandstone	pale yellowlish	38.7438	25.6317	35.6245
	85.25	UDC-341	sandstone	gray	25.3155	19.84	54.8445
Average					32.2078	36.6822	31.11
Standard Deviation					8.02841	11.0152	13.9423
Note that clay and finest silt used here is less than 8 μm and sand larger than 64 μm
